# Supplementary material for: Spotting Loneliness at School: Associations between Self-Reports and Teacher and Peer Nominations
Source: PubMed Central journal article supplement (PMC7908606; doi:10.3390/ijerph18030971), 2021-01-22
Supplement: ijerph-18-00971-s001.pdf [file ijerph-18-00971-s001.pdf]

## Supplementary Material

Table S1

*Attrition Analyses of Study 2*

|            | Mean ( <i>SD</i> )<br>Included | Mean ( <i>SD</i> )<br>Excluded | <i>F</i>  | <i>df</i> | $\eta^2_p$ | $\chi^2$ | <i>df</i> | Cramer <i>V</i> |
|------------|--------------------------------|--------------------------------|-----------|-----------|------------|----------|-----------|-----------------|
| Loneliness | 1.50 (0.51)                    | 1.59 (0.58)                    | 4.641*    | (1, 753)  | .006       |          |           |                 |
| Age        | 13.82 (0.42)                   | 13.98 (0.54)                   | 20.651*** | (1, 568)  | .026       |          |           |                 |
| Gender     |                                |                                |           |           |            | 1.48     | 1         | .044            |

*Note.*  $\eta^2_p$  = partial eta squared.  $\chi^2$  = Pearson chi squared.

\*  $p < .05$ , \*\*  $p < .01$ , \*\*\*  $p < .001$ .
